# Supplementary material for: Myzomyia and Pyretophorus series of Anopheles mosquitoes acting as probable vectors of the goat malaria parasite Plasmodium caprae in Thailand
Source: PubMed Central journal article supplement (PMC9812981; doi:10.1038/s41598-022-26833-4), 2023-01-04
Supplement: 41598_2022_26833_MOESM1_ESM.pdf [file 41598_2022_26833_MOESM1_ESM.pdf]

**Table S1.** Primer sequences and PCR conditions for mosquito species identification

| <b>Mosquito*</b><br><b>(Target gene)</b> | <b>Primer</b><br><b>name</b> | <b>Primer sequence (5'–3')</b>                                | <b>Expected</b><br><b>size (bp)</b> | <b>PCR condition</b>                                                                                               |
|------------------------------------------|------------------------------|---------------------------------------------------------------|-------------------------------------|--------------------------------------------------------------------------------------------------------------------|
| <i>Anopheles</i> spp.<br>( <i>cox1</i> ) | AnplCox1-F<br>AnplCox1-R     | GGATCCCTTCAGCCATTTAATCGCG<br>TCGAGCTTAAATTCATTGCACTAATCTGCC   | 1,584                               | 94°C: 5 min<br><b>40 cycles: 98°C: 10 sec,</b><br><b>56°C: 30 sec; 68°C: 1 min</b><br><b>40 sec</b><br>68°C: 5 min |
| <i>Anopheles</i> spp.<br>( <i>cox2</i> ) | AnplCox2-F<br>AnplCox2-R     | GGATCCAGATTAGTGCAATGAATTTAAGC<br>CTGCAGGATTTAAGAGATCATTACTTGC | 792                                 | 94°C: 5 min<br><b>40 cycles: 98°C: 10 sec,</b><br><b>58°C: 30 sec; 68°C: 50 sec</b><br>68°C: 5 min                 |
| <i>Anopheles</i> spp.<br>(ITS2)          | ITS2A<br>ITS2B               | TGTGAACTGCAGGACACAT<br>TATGCTTAAATTCAGGGGGT                   | 450 – 1,500                         | 94°C: 5 min<br><b>40 cycles: 98°C: 10 sec,</b><br><b>54°C: 30 sec; 68°C: 1 min</b><br><b>30 sec</b><br>68°C: 5 min |

Note: \*Abbreviation: *cytb*, cytochrome *b*; *cox1*, cytochrome *c* oxidase subunit 1; *cox2*, cytochrome *c* oxidase subunit 2; ITS2, Internal Transcribed Spacer 2; min, minute(s); sec, seconds. Letters in bold indicate amplification steps, including denaturation, annealing, and extension in 40 cycles.

**Table S2.** Primer sequences and PCR conditions for *Plasmodium* detection in goat blood and mosquito

| <b>Parasite<br/>(Target gene)</b>       | <b>Primer name</b>                  | <b>Primer sequence (5'–3')</b> | <b>Expect<br/>size (bp)</b>        | <b>PCR condition</b>                                                          |                                                              |
|-----------------------------------------|-------------------------------------|--------------------------------|------------------------------------|-------------------------------------------------------------------------------|--------------------------------------------------------------|
| <i>P. caprae</i><br>( <i>cox1</i> )     | Cox1_PbubF<br>(outer)               | GTACATTTACTTTTGGTGGTAC         | 616                                | 94°C: 5 min                                                                   |                                                              |
|                                         | Cox1_PbubR<br>(outer)               | CCATCCACTCCATAATTCTC           |                                    | <b>40 cycles: 98°C: 10 sec, 50°C:<br/>30 sec; 68°C: 40 sec</b><br>68°C: 5 min |                                                              |
|                                         | PbuCox1-F3-2<br>(inner)             | ATTATGTAATTGCACATTTCCATTTTG    | 283                                | 94°C: 5 min                                                                   |                                                              |
|                                         | PbuCox1-4B3<br>(inner)              | CCAAATAAAGTCATTGTWGAACC        |                                    | <b>40 cycles: 98°C: 10 sec, 60°C:<br/>30 sec; 68°C: 20 sec</b><br>68°C: 5 min |                                                              |
|                                         | <i>P. caprae</i><br>( <i>cytb</i> ) | DW2 (outer)                    | TAATGCCTAGACGTATTCCTGATTAT<br>CCAG | 1,138                                                                         | 94°C: 5 min                                                  |
|                                         |                                     | DW4 (outer)                    | TGTTTGCTTGGGAGCTGTAATCATAA<br>TGTG |                                                                               | <b>40 cycles: 98°C: 10 sec, 62°C:<br/>3 min; 68°C: 5 min</b> |
| NCYBINF<br>(inner)                      |                                     | TAAGAGAATTATGGAGTGGATGGTG      | 822                                | 94°C: 5 min                                                                   |                                                              |
| NCYBINR<br>(inner)                      |                                     | CTTGTGGTAATTGACATCCAATCC       |                                    | <b>40 cycles: 98°C: 10 sec, 62°C:<br/>3 min; 68°C: 5 min</b>                  |                                                              |
| <i>P. caprae</i><br>( <i>18S rRNA</i> ) | rPLU6 (outer)                       | TTAAAATTGTTGCAGTTAAAACG        | 1,200                              | 94°C: 5 min                                                                   |                                                              |

|                     |                          |     |                                                                                          |
|---------------------|--------------------------|-----|------------------------------------------------------------------------------------------|
| rPLU5 (outer)       | CCGTTGTTGCCTTAAACTTC     |     | <b>40 cycles: 98°C: 10 sec, 55°C: 30 sec; 68°C: 1 min 30 sec</b><br>68°C: 5 min          |
| PlaSSUF1<br>(inner) | CTTAGTTACGATTAATAGGAGTAG | 420 | 94°C: 5 min<br><b>40 cycles: 98°C: 10 sec, 49°C: 30 sec; 68°C: 30 sec</b><br>68°C: 5 min |
| PlaSSUR1<br>(inner) | TCCTACTCTTGTCTTAAACTAG   |     | 68°C: 5 min                                                                              |

Note: \*Abbreviation: *cox1*, cytochrome c oxidase subunit 1; *cytb*, cytochrome b; *18S rRNA*, 18S small subunit ribosomal RNA. Letters in bold indicate amplification steps, including denaturation, annealing, and extension in 40 cycles.
